# Supplementary material for: From cradle to grave: tracking socioeconomic inequalities in mortality in a cohort of 11 868 men and women born in Uppsala, Sweden, 1915–1929
Source: HighWire-hosted journal article supplement (doi:10.1136/jech-2015-206547), 2016-01-05
Supplement: jech-2015-206547supp.pdf [file jech-2015-206547supp.pdf]

**SUPPLEMENTARY MATERIAL**

Table 1. Association between childhood social characteristics and all-cause mortality: age-varying hazard ratios and 95% confidence intervals. Uppsala Birth Cohort study, 1915-1929 (N=11 868)

| Age (years) intervals<br>No. subjects (no. deaths) | <b>&lt;1 (1915-1929)</b><br>N=11,868 (713; 6.0%) |                            |                            | <b>1-19 (1916-1948)</b><br>N=11 149 (486; 4.4%) |                            |                            | <b>20-54 (1935-1983)</b><br>N=9 882 (767; 7.8%) |                            |                            |           |           |           |
|----------------------------------------------------|--------------------------------------------------|----------------------------|----------------------------|-------------------------------------------------|----------------------------|----------------------------|-------------------------------------------------|----------------------------|----------------------------|-----------|-----------|-----------|
|                                                    | <b>Minimal</b><br><b>HR</b>                      | <b>Adj. 1</b><br><b>HR</b> | <b>Adj. 2</b><br><b>HR</b> | <b>Minimal</b><br><b>HR</b>                     | <b>Adj. 1</b><br><b>HR</b> | <b>Adj. 2</b><br><b>HR</b> | <b>Minimal</b><br><b>HR</b>                     | <b>Adj. 1</b><br><b>HR</b> | <b>Adj. 2</b><br><b>HR</b> |           |           |           |
|                                                    | no. deaths                                       | 95%CI                      | 95%CI                      | 95%CI                                           | no. deaths                 | 95%CI                      | 95%CI                                           | 95%CI                      | no. deaths                 | 95%CI     | 95%CI     | 95%CI     |
| <b>Mother's marital status</b>                     |                                                  |                            |                            |                                                 |                            |                            |                                                 |                            |                            |           |           |           |
| Married (ref)                                      | 562                                              |                            |                            |                                                 | 397                        |                            |                                                 |                            | 644                        |           |           |           |
| Unmarried                                          | 151                                              | 1.47***                    | 1.47***                    | 1.42**                                          | 89                         | 1.25                       | 1.46**                                          | 1.44**                     | 123                        | 1.07      | 1.13      | 1.16      |
|                                                    |                                                  | 1.23,1.76                  | 1.19,1.80                  | 1.10,1.76                                       |                            | 0.99,1.57                  | 1.13,1.88                                       | 1.10,1.88                  |                            | 0.88,1.30 | 0.91,1.40 | 0.92,1.45 |
| <b>Family socioeconomic position</b>               |                                                  |                            |                            |                                                 |                            |                            |                                                 |                            |                            |           |           |           |
| High (ref)                                         | 182                                              |                            |                            |                                                 | 127                        |                            |                                                 |                            | 200                        |           |           |           |
| Middle                                             | 142                                              | 0.98                       | 0.94                       | 0.93                                            | 106                        | 1.01                       | 1.01                                            | 1.00                       | 190                        | 1.18      | 1.17      | 1.17      |
|                                                    |                                                  | 0.78,1.22                  | 0.75,1.18                  | 0.74,1.17                                       |                            | 0.77,1.31                  | 0.78,1.30                                       | 0.76,1.30                  |                            | 0.97,1.44 | 0.96,1.43 | 0.96,1.43 |
| Low                                                | 389                                              | 1.21*                      | 1.14                       | 1.05                                            | 253                        | 1.11                       | 1.12                                            | 1.03                       | 377                        | 1.07      | 1.05      | 1.02      |
|                                                    |                                                  | 1.01,1.45                  | 0.95,1.38                  | 0.86,1.28                                       |                            | 0.89,1.37                  | 0.90,1.41                                       | 0.81,1.31                  |                            | 0.90,1.26 | 0.88,1.26 | 0.84,1.23 |

*Continues in the next page...*

| Age (years) intervals                | <b>55-64 (1970-1993)</b> |               |               | <b>65-74 (1980-2003)</b> |               |               | <b>75+ (1990-2009)</b> |               |               |              |              |           |
|--------------------------------------|--------------------------|---------------|---------------|--------------------------|---------------|---------------|------------------------|---------------|---------------|--------------|--------------|-----------|
| No. subjects (no. deaths)            | N=9 776 (870; 8.9%)      |               |               | N= 8 882 (1 678; 19.0%)  |               |               | N= 7 187(3502; 48.7%)  |               |               |              |              |           |
|                                      | <b>Minimal</b>           | <b>Adj. 1</b> | <b>Adj. 2</b> | <b>Minimal</b>           | <b>Adj. 1</b> | <b>Adj. 2</b> | <b>Minimal</b>         | <b>Adj. 1</b> | <b>Adj. 2</b> |              |              |           |
|                                      | <b>HR</b>                | <b>HR</b>     | <b>HR</b>     | <b>HR</b>                | <b>HR</b>     | <b>HR</b>     | <b>HR</b>              | <b>HR</b>     | <b>HR</b>     |              |              |           |
| no. deaths                           | <b>95%CI</b>             | <b>95%CI</b>  | <b>95%CI</b>  | no. deaths               | <b>95%CI</b>  | <b>95%CI</b>  | <b>95%CI</b>           | no. deaths    | <b>95%CI</b>  | <b>95%CI</b> | <b>95%CI</b> |           |
| <b>Mother's marital status</b>       |                          |               |               |                          |               |               |                        |               |               |              |              |           |
| Married (ref)                        | 743                      |               |               | 1399                     |               |               |                        | 2928          |               |              |              |           |
| Unmarried                            | 127                      | 0.97          | 1.04          | 0.94                     | 279           | 1.13          | 1.15                   | 1.11          | 574           | 1.23***      | 1.24***      | 1.21***   |
|                                      |                          | 0.80,1.17     | 0.85,1.29     | 0.75,1.17                |               | 0.99,1.29     | 1.00,1.33              | 0.95,1.29     |               | 1.12,1.34    | 1.12,1.37    | 1.09,1.34 |
| <b>Family socioeconomic position</b> |                          |               |               |                          |               |               |                        |               |               |              |              |           |
| High (ref)                           | 205                      |               |               | 418                      |               |               |                        | 928           |               |              |              |           |
| Middle                               | 195                      | 1.21          | 1.22          | 1.22                     | 401           | 1.26**        | 1.25**                 | 1.25**        | 796           | 1.12*        | 1.11*        | 1.11*     |
|                                      |                          | 0.99,1.48     | 1.00,1.50     | 1.00,1.45                |               | 1.10,1.45     | 1.09,1.44              | 1.09,1.44     |               | 1.02,1.24    | 1.01,1.23    | 1.01,1.23 |
| Low                                  | 470                      | 1.32***       | 1.36***       | 1.38***                  | 859           | 1.22***       | 1.22**                 | 1.19**        | 1778          | 1.18***      | 1.15***      | 1.12*     |
|                                      |                          | 1.12,1.57     | 1.14,1.62     | 1.15,1.65                |               | 1.09,1.38     | 1.08,1.38              | 1.05,1.36     |               | 1.09,1.27    | 1.06,1.25    | 1.01,1.20 |

\*  $P < 0.05$ , \*\*  $P < 0.01$ , \*\*\*  $P < 0.001$ .

Note: Minimal (subject's sex and birth year), Adjusted 1 (minimal + birthweight, gestational age, parity and maternal age), Adjusted 2 (Partial + mutually adjusted for familial socioeconomic position and marital status).

Abbreviations: Number (No), Hazard Ratio (HR), CI (Confidence Intervals)

Note: No interactions were found between family socioeconomic status and mother's marital status at any age intervals ( $P$ -value  $> 0.01$ )

Table 2. Association between childhood social characteristics and all-cause mortality: age-varying hazard ratios and 95% confidence intervals. Uppsala Birth Cohort study, 1915-1929 (N=9450)

| Age (years) intervals                |       | 55-64 (1970-1993) |           |           |                 | 65-74 (1980-2003)   |            |           |           | 75+ (1990-2009)   |       |            |           |           |                 |
|--------------------------------------|-------|-------------------|-----------|-----------|-----------------|---------------------|------------|-----------|-----------|-------------------|-------|------------|-----------|-----------|-----------------|
| No. subjects (no. deaths)            |       | 9450 (820; 8.7%)  |           |           |                 | 8616 (1,595; 19.0%) |            |           |           | 7005 (3,778; 48%) |       |            |           |           |                 |
|                                      | No. D | Minimal HR        | Adj.1 HR  | Adj.2 HR  | Adj.2.+adult HR | No. D               | Minimal HR | Adj.1 HR  | Adj.2 HR  | Adj.2.+adult HR   | No. D | Minimal HR | Adj.1 HR  | Adj.2 HR  | Adj.2.+adult HR |
|                                      |       | 95%CI             | 95%CI     | 95%CI     | 95%CI           |                     | 95%CI      | 95%CI     | 95%CI     | 95%CI             |       | 95%CI      | 95%CI     | 95%CI     | 95%CI           |
| <b>Childhood characteristics</b>     |       |                   |           |           |                 |                     |            |           |           |                   |       |            |           |           |                 |
| <b>Mother's marital status</b>       |       |                   |           |           |                 |                     |            |           |           |                   |       |            |           |           |                 |
| Married (ref)                        | 703   |                   |           |           |                 | 1333                |            |           |           |                   | 2839  |            |           |           |                 |
| Unmarried                            | 117   | 0.95              | 1.02      | 0.92      | 0.88            | 262                 | 1.12       | 1.13      | 1.06      | 1.06              | 555   | 1.22***    | 1.23***   | 1.19**    | 1.16**          |
|                                      |       | 0.78,1.16         | 0.82,1.27 | 0.73,1.16 | 0.70,1.16       |                     | 0.98,1.28  | 0.97,1.30 | 0.93,1.27 | 0.90,1.23         |       | 1.11,1.34  | 1.11,1.35 | 1.07,1.33 | 1.05,1.29       |
| <b>Family socioeconomic position</b> |       |                   |           |           |                 |                     |            |           |           |                   |       |            |           |           |                 |
| High (ref)                           | 196   |                   |           |           |                 | 397                 |            |           |           |                   | 888   |            |           |           |                 |
| Middle                               | 183   | 1.18              | 1.19      | 1.19      | 1.22            | 381                 | 1.25**     | 1.24**    | 1.24**    | 1.25**            | 775   | 1.14**     | 1.13*     | 1.13*     | 1.14**          |
|                                      |       | 0.96,1.46         | 0.97,1.47 | 0.97,1.47 | 0.99,1.50       |                     | 1.08,1.44  | 1.08,1.43 | 1.08,1.43 | 1.08,1.45         |       | 1.04,1.26  | 1.05,1.25 | 1.02,1.25 | 1.04,1.26       |
| Low                                  | 441   | 1.29**            | 1.32**    | 1.35**    | 1.30**          | 817                 | 1.22**     | 1.19**    | 1.19**    | 1.15*             | 1731  | 1.19***    | 1.16***   | 1.12*     | 1.10*           |
|                                      |       | 1.09,1.53         | 1.11,1.58 | 1.12,1.62 | 1.08,1.56       |                     | 1.08,1.37  | 1.04,1.36 | 1.04,1.36 | 1.00,1.31         |       | 1.09,1.29  | 1.07,1.27 | 1.02,1.22 | 1.01,1.20       |
| <b>Adult characteristics</b>         |       |                   |           |           |                 |                     |            |           |           |                   |       |            |           |           |                 |
| <b>Education</b>                     |       |                   |           |           |                 |                     |            |           |           |                   |       |            |           |           |                 |
| Low (ref)                            | 546   |                   |           |           |                 | 1023                |            |           |           |                   | 2048  |            |           |           |                 |
| High                                 | 274   |                   |           |           | 0.75***         | 572                 |            |           |           | 0.76***           | 1346  |            |           |           | 0.91*           |
|                                      |       |                   |           |           | 0.64,0.88       |                     |            |           |           | 0.68,0.85         |       |            |           |           | 0.85,0.99       |
| <b>Occupation</b>                    |       |                   |           |           |                 |                     |            |           |           |                   |       |            |           |           |                 |
| Disadvantaged (ref)                  | 487   |                   |           |           |                 | 894                 |            |           |           |                   | 1745  |            |           |           |                 |
| Advantaged                           | 333   |                   |           |           | 0.92            | 701                 |            |           |           | 0.94              | 1649  |            |           |           | 0.93            |
|                                      |       |                   |           |           | 0.79,1.08       |                     |            |           |           | 0.84,1.06         |       |            |           |           | 0.86,1.00       |
| <b>Income (tertiles)</b>             |       |                   |           |           |                 |                     |            |           |           |                   |       |            |           |           |                 |
| Lowest (ref)                         | 333   |                   |           |           |                 | 576                 |            |           |           |                   | 1075  |            |           |           |                 |
| Middle                               | 246   |                   |           |           | 0.77**          | 527                 |            |           |           | 0.93              | 1175  |            |           |           | 1.00            |
|                                      |       |                   |           |           | 0.65,0.92       |                     |            |           |           | 0.82,1.04         |       |            |           |           | 0.92,1.09       |
| Highest                              | 241   |                   |           |           | 0.85            | 492                 |            |           |           | 0.93              | 1144  |            |           |           | 0.91*           |
|                                      |       |                   |           |           | 0.71,1.01       |                     |            |           |           | 0.82,1.06         |       |            |           |           | 0.83,0.99       |
| <b>Marital status</b>                |       |                   |           |           |                 |                     |            |           |           |                   |       |            |           |           |                 |
| Married (ref)                        | 651   |                   |           |           |                 | 1306                |            |           |           |                   | 2850  |            |           |           |                 |
| Unmarried                            | 169   |                   |           |           | 1.37***         | 289                 |            |           |           | 1.24**            | 544   |            |           |           | 1.32***         |
|                                      |       |                   |           |           | 1.15,1.63       |                     |            |           |           | 1.09,1.41         |       |            |           |           | 1.20,1.46       |

Note: No interactions were found between subject's gender and (early and adult) socioeconomic characteristics on mortality at any age intervals (all P-values >0.05). Minimal (subject's sex and birth year), Adjusted 1 (minimal + birthweight, gestational age, parity and maternal age), Adjusted 2 (Partial + mutually adjusted for familial socioeconomic position and marital status). Abbreviations: Number (No), Hazard Ratio (HR), CI (Confidence Intervals), No. D (Number of Deaths). In a sensitivity analysis we disaggregated marital status in adulthood further and we found that the strength of the association is slightly higher among divorced than among single mothers and there was not enough statistical power to draw any conclusion for widows
